# Supplementary material for: Comorbidities among adult patients with psoriasis in Tianjin: a cross-sectional analysis of the Health Database study
Source: HighWire-hosted journal article supplement (doi:10.1136/bmjopen-2023-083683), 2024-05-01
Supplement: bmjopen-2023-083683supp001_data_supplement.pdf [file bmjopen-2023-083683supp001_data_supplement.pdf]

**STable 1** Prevalence of medical comorbidities in patients with psoriasis vs. comparison of two groups in baseline and 12 months follow-up period.

| Variable                                  | Baseline            |                     |                      | 12 months follow-up period |                     |                      |
|-------------------------------------------|---------------------|---------------------|----------------------|----------------------------|---------------------|----------------------|
|                                           | Control             | Psoriasis           | p-value <sup>2</sup> | Control                    | Psoriasis           | p-value <sup>2</sup> |
|                                           | group,              | group,              |                      | group,                     | group,              |                      |
|                                           | n                   | n                   |                      | n                          | n                   |                      |
|                                           | 20,678 <sup>1</sup> | 20,678 <sup>1</sup> |                      | 20,678 <sup>1</sup>        | 20,678 <sup>1</sup> |                      |
| Thyroid Cancer                            | 11<br>(<0.1%)       | 23 (0.1%)           | 0.040                | 22<br>(0.1%)               | 29 (0.1%)           | 0.3                  |
| AIDS                                      | 19<br>(<0.1%)       | 12<br>(<0.1%)       | 0.2                  | 27<br>(0.1%)               | 16<br>(<0.1%)       | 0.093                |
| Autoimmune<br>Thyroid Disease             | 14<br>(<0.1%)       | 24 (0.1%)           | 0.1                  | 29<br>(0.1%)               | 41 (0.2%)           | 0.2                  |
| Lymphoma                                  | 14<br>(<0.1%)       | 12<br>(<0.1%)       | 0.7                  | 24<br>(0.1%)               | 17<br>(<0.1%)       | 0.3                  |
| Obesity                                   | 16<br>(<0.1%)       | 23 (0.1%)           | 0.3                  | 41<br>(0.2%)               | 33 (0.2%)           | 0.4                  |
| Metabolic<br>Syndrome                     | 5<br>(<0.1%)        | 2 (<0.1%)           | 0.5                  | 2<br>(<0.1%)               | 0 (0%)              | 0.5                  |
| Thyroiditis                               | 59<br>(0.3%)        | 82 (0.4%)           | 0.052                | 98<br>(0.5%)               | 104<br>(0.5%)       | 0.7                  |
| Thyroid Disease                           | 740<br>(3.6%)       | 774<br>(3.7%)       | 0.4                  | 902<br>(4.4%)              | 892<br>(4.3%)       | 0.8                  |
| Nonalcoholic<br>Steatohepatitis<br>(NASH) | 0 (0%)              | 4 (<0.1%)           | 0.125                | 1<br>(<0.1%)               | 0 (0%)              | >0.9                 |

<sup>1</sup>n (%)

---

<sup>2</sup>Fisher's exact test; The  $\chi^2$  test of independence.
